# Supplementary material
Source: publisher site journal article supplement (https://www.dovepress.com/article/530418)
Supplement: Supplementary file 1 [file Supplementary%20materials_2.docx]

**
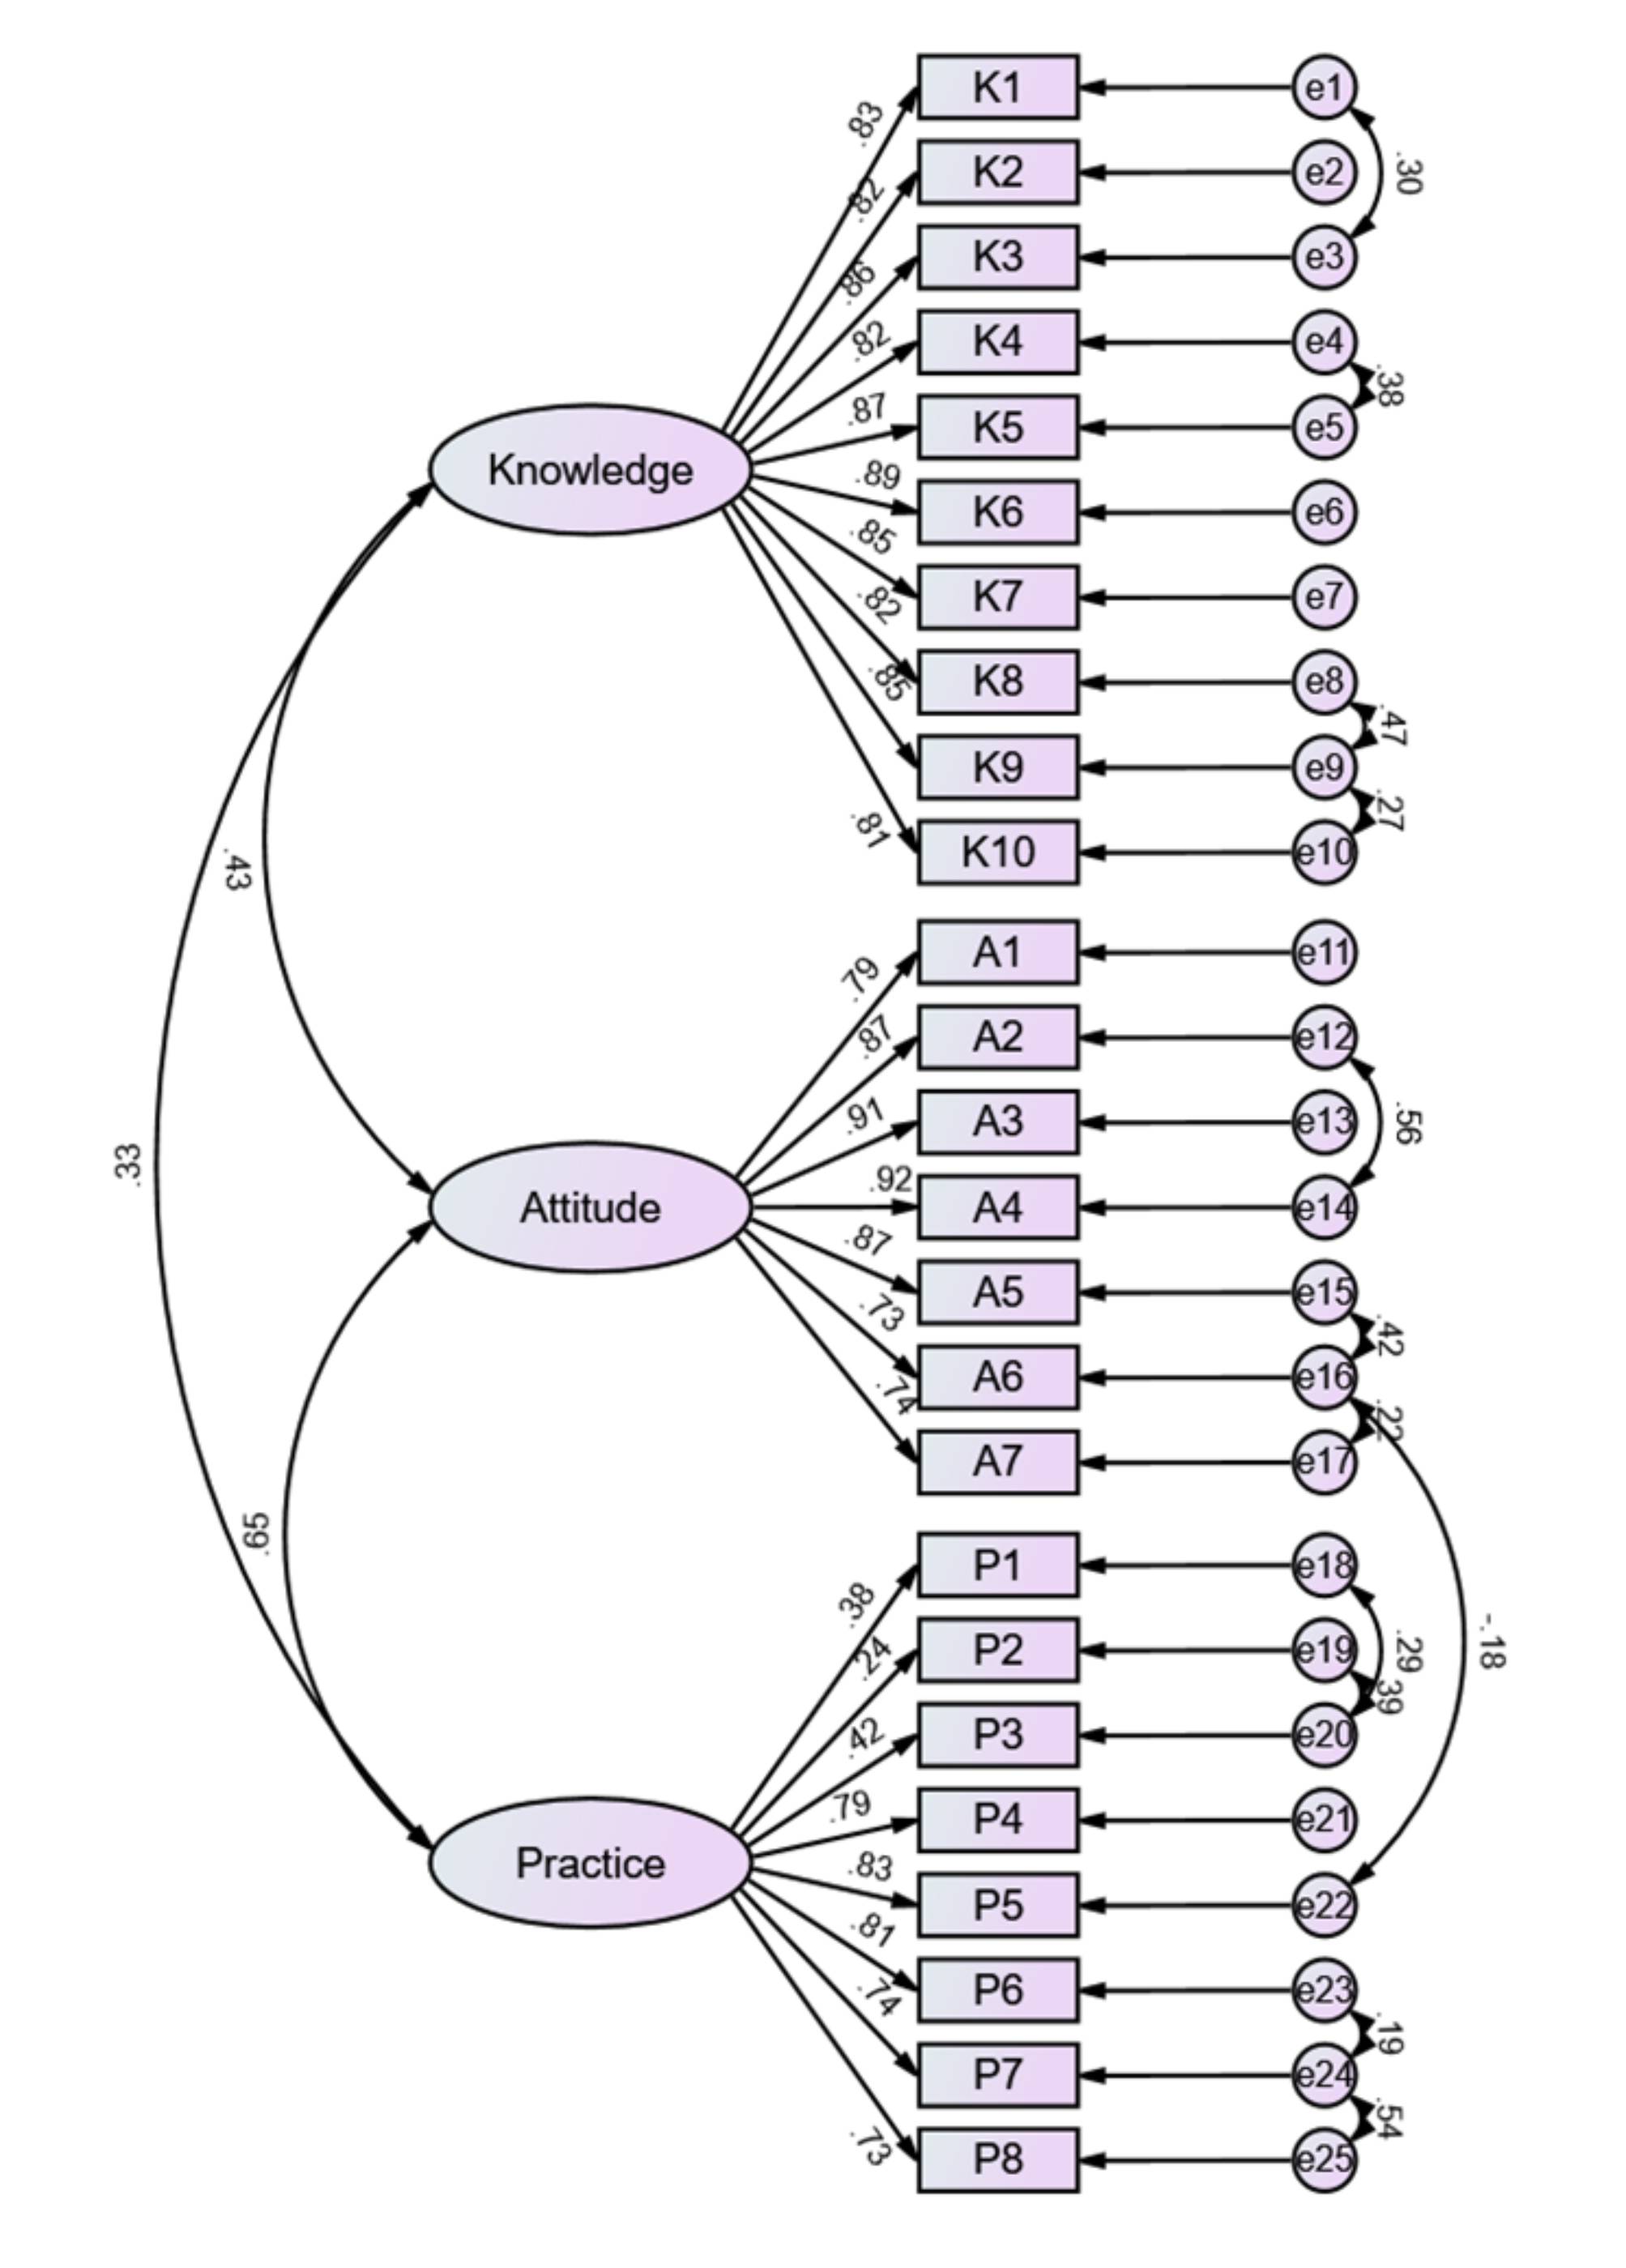
Figure S1**. Confirmatory factor analysis (CFA) model

**Table S1.** Post-Hoc Tests of Baseline Characteristics

|  | | **Knowledge** | | **Attitude** | | **Practice** | |
| --- | --- | --- | --- | --- | --- | --- | --- |
| **P** | **Bonferroni P** | **P** | **Bonferroni P** | **P** | **Bonferroni P** |
| **BMI** | Underweight VS Normal | 0.002 | 0.011 | 0.671 | 1.000 | 0.106 | 0.639 |
| Underweight VS Overweight | <0.001 | 0.001 | 0.675 | 1.000 | 0.086 | 0.519 |
| Underweight VS Obesity | <0.001 | 0.003 | 0.228 | 1.000 | 0.008 | 0.049 |
| Normal VS Overweight | 0.136 | 0.814 | 0.986 | 1.000 | 0.767 | 1.000 |
| Normal VS Obesity | 0.312 | 1.000 | 0.006 | 0.037 | 0.045 | 0.271 |
| Overweight VS Obesity | 0.836 | 1.000 | 0.011 | 0.064 | 0.103 | 0.617 |
| **Education** | Junior high school or below VS High school/Technical school | 0.116 | 1.000 | 0.986 | 1.000 | 0.116 | 1.000 |
| Junior high school or below VS College | 0.019 | 0.191 | <0.001 | 0.004 | 0.087 | 0.874 |
| Junior high school or below VS Bachelor’s degree | <0.001 | 0.001 | <0.001 | 0.001 | <0.001 | 0.002 |
| Junior high school or below Master’s degree and above | <0.001 | 0.001 | <0.001 | 0.001 | <0.001 | 0.001 |
| High school/Technical school VS College | 0.439 | 1.000 | <0.001 | 0.001 | 0.985 | 1.000 |
| High school/Technical school VS Bachelor’s degree | <0.001 | 0.001 | <0.001 | 0.001 | 0.015 | 0.146 |
| High school/Technical school VS Master’s degree and above | <0.001 | 0.001 | <0.001 | 0.001 | 0.001 | 0.015 |
| College VS Bachelor’s degree | <0.001 | 0.004 | 0.277 | 1.000 | 0.005 | 0.047 |
| College VS Master’s degree and above | <0.001 | 0.001 | 0.020 | 0.200 | <0.001 | 0.008 |
| Bachelor’s degree VS Master’s degree and above | 0.054 | 0.544 | 0.082 | 0.820 | 0.081 | 0.806 |
| **Occupation** | Employed VS Homemaker | 0.707 | 1.000 | 0.463 | 1.000 | 0.569 | 1.000 |
| Employed VS Freelancer | 0.089 | 0.537 | <0.001 | 0.001 | 0.040 | 0.242 |
| Employed VS Other | <0.001 | 0.002 | <0.001 | 0.002 | <0.001 | 0.001 |
| Homemaker VS Freelancer | 0.434 | 1.000 | 0.077 | 0.463 | 0.067 | 0.403 |
| Homemaker VS Other | 0.032 | 0.195 | 0.060 | 0.359 | 0.002 | 0.010 |
| Freelancer VS Other | 0.098 | 0.588 | 0.831 | 1.000 | 0.101 | 0.608 |
| **Pregnancy Trimester** | Early pregnancy VS Mid-pregnancy | / | / | 0.001 | 0.004 | 0.003 | 0.009 |
| Early pregnancy VS Late pregnancy | / | / | <0.001 | 0.002 | 0.284 | 0.852 |
| Mid-pregnancy VS Late pregnancy | / | / | 0.704 | 1.000 | 0.008 | 0.025 |

**Table S2.** Confirmatory factor analysis fits

| **Indicators** | **Reference** | **Actual** |
| --- | --- | --- |
| CMIN/DF | 1-3: Excellent, 3-5: Good | 4.732 |
| RMSEA | <0.08: Good | 0.079 |
| IFI | >0.8: Good | 0.925 |
| TLI | >0.8: Good | 0.913 |
| CFI | >0.8: Good | 0.925 |

**Table S3.** Confirmatory factor analysis Regression Weights

|  |  |  | **Estimate** | **Standardized Estimate** | **S.E.** | **C.R.** | **P** |
| --- | --- | --- | --- | --- | --- | --- | --- |
| K1 | <--- | Knowledge | 1.000 | 0.830 |  |  |  |
| K2 | <--- | Knowledge | 0.959 | 0.815 | 0.041 | 23.588 | <0.001 |
| K3 | <--- | Knowledge | 1.085 | 0.856 | 0.036 | 30.512 | <0.001 |
| K4 | <--- | Knowledge | 1.084 | 0.821 | 0.046 | 23.813 | <0.001 |
| K5 | <--- | Knowledge | 1.068 | 0.870 | 0.041 | 26.146 | <0.001 |
| K6 | <--- | Knowledge | 1.134 | 0.889 | 0.042 | 27.133 | <0.001 |
| K7 | <--- | Knowledge | 1.074 | 0.853 | 0.042 | 25.358 | <0.001 |
| K8 | <--- | Knowledge | 0.992 | 0.824 | 0.041 | 23.993 | <0.001 |
| K9 | <--- | Knowledge | 1.000 | 0.846 | 0.040 | 25.004 | <0.001 |
| K10 | <--- | Knowledge | 1.007 | 0.807 | 0.043 | 23.220 | <0.001 |
| A1 | <--- | Attitude | 1.000 | 0.790 |  |  |  |
| A2 | <--- | Attitude | 1.119 | 0.871 | 0.047 | 23.797 | <0.001 |
| A3 | <--- | Attitude | 1.070 | 0.911 | 0.042 | 25.453 | <0.001 |
| A4 | <--- | Attitude | 1.080 | 0.918 | 0.042 | 25.697 | <0.001 |
| A5 | <--- | Attitude | 1.163 | 0.874 | 0.048 | 24.026 | <0.001 |
| A6 | <--- | Attitude | 1.040 | 0.727 | 0.055 | 18.830 | <0.001 |
| A7 | <--- | Attitude | 0.964 | 0.742 | 0.050 | 19.346 | <0.001 |
| P1 | <--- | Practice | 1.000 | 0.385 |  |  |  |
| P2 | <--- | Practice | 0.622 | 0.237 | 0.132 | 4.718 | <0.001 |
| P3 | <--- | Practice | 0.959 | 0.418 | 0.117 | 8.210 | <0.001 |
| P4 | <--- | Practice | 1.536 | 0.789 | 0.173 | 8.859 | <0.001 |
| P5 | <--- | Practice | 1.618 | 0.831 | 0.180 | 8.966 | <0.001 |
| P6 | <--- | Practice | 1.661 | 0.810 | 0.186 | 8.910 | <0.001 |
| P7 | <--- | Practice | 1.416 | 0.742 | 0.163 | 8.702 | <0.001 |
| P8 | <--- | Practice | 1.306 | 0.731 | 0.150 | 8.684 | <0.001 |
